# Supplementary material for: Unearthing a Cryptic Biosynthetic Gene Cluster for the Piperazic Acid-Bearing Depsipeptide Diperamycin in the Ant-Dweller Streptomyces sp. CS113
Source: MDPI journal article supplement (doi:10.3390/ijms25042347), 2024-02-16
Supplement: s1 [file s1]

## SUPPLEMENTARY MATERIAL

### **Unearthing a Cryptic Biosynthetic Gene Cluster for the Piperazic Acid-Bearing Depsipeptide Diperamycin in the Ant-dweller *Streptomyces* sp. CS113**

**Coral García-Gutiérrez<sup>1,2</sup>, Ignacio Pérez-Victoria<sup>3</sup>, Ignacio Montero<sup>1,2</sup>, Jorge Fernández-De la Hoz,<sup>1</sup> Mónica G. Malmierca<sup>1</sup>, Jesús Martín<sup>3</sup>, José A. Salas,<sup>1,2</sup> Carlos Olano<sup>1,2</sup>, Fernando Reyes<sup>3</sup>, and Carmen Méndez<sup>1,2,\*</sup>**

<sup>1</sup> Departamento de Biología Funcional e Instituto Universitario de Oncología del Principado de Asturias (I.U.O.P.A), Universidad de Oviedo, 33006 Oviedo, Spain

<sup>2</sup> Instituto de Investigación Sanitaria de Asturias (ISPA), 33011 Oviedo, Spain

<sup>3</sup> Fundación MEDINA, Centro de Excelencia en Investigación de Medicamentos Innovadores en Andalucía, 18016 Granada, Spain

\* Correspondence: [cmendezf@uniovi.es](mailto:cmendezf@uniovi.es)

**Table S1.** Predicted functions of gene products from the *Streptomyces* sp. CS113 diperamycin biosynthesis gene cluster (*dpn*)

| Gene product | aa   | Predicted function                               | <i>Streptomyces tendae</i> | <i>Streptomyces</i> sp. NRRL F-5650 | <i>Streptomyces</i> sp. PSAA01 |
|--------------|------|--------------------------------------------------|----------------------------|-------------------------------------|--------------------------------|
| DpnL         | 286  | Fatty acyl-AMP ligase                            | WP_282090654 (97.37)       | WP_051852084 (92.48)                | WP_237510125 (86.47)           |
| DpnZ         | 214  | Piperazate synthase                              | WP_282090653 (95.77)       | WP_031046733 (88.32)                | MCG0283772 (84.11)             |
| DpnA         | 266  | Amidinotransferase                               | WP_282090652 (98.5)        | WP_031046736 (93.98)                | WP_237510127 (88.68)           |
| DpnB1        | 261  | Thioesterase                                     | WP_282090651 (94.25)       | WP_031046739 (91.94)                | WP_237510128 (84.12)           |
| DpnS1        | 1081 | NRPS                                             | WP_282090685 (95.93)       | WP_199807506 (90.79)                | WP_272933258 (82.69)           |
| DpnO1        | 517  | FAD-dependent monooxygenase                      | WP_282090650 (98.44)       | WP_234332323 (97.29)                | WP_272933259 (92.0)            |
| DpnP4        | 1045 | Type I PKS                                       | WP_282090684 (ND)          | WP_037836816 (ND)                   | WP_237510131 (84.3)            |
| DpnP3        | 2189 | Type I PKS                                       | WP_282090925 (ND)          | WP_037837542 (ND)                   | NI                             |
| DpnP2        | 1871 | Type I PKS                                       | WP_282090926 (ND)          | WP_234332486 (93.57)                | NI                             |
| DpnP1        | 1036 | Type I PKS                                       | WP_282090898 (93.39)       | WP_037837494 (92.95)                | WP_237510737 (83.51)           |
| DpnR1        | 1047 | BTAD domain-containing transcriptional regulator | WP_282090897 (97.13)       | WP_031050885 (95.8)                 | WP_237510738 (87.28)           |
| DpnT1        | 551  | Putative exporter                                | WP_282090896 (97.51)       | WP_199807543 (94.83)                | WP_237510739 (86.21)           |
| DpnT2        | 323  | ABC transporter ATP-binding protein              | WP_282090895 (99.04)       | WP_234332468 (96.59)                | WP_237510740 (85.54)           |
| DpnB2        | 238  | Thioesterase                                     | WP_282090894 (98.74)       | WP_234332470 (98.32)                | WP_237510741 (80.67)           |
| DpnO2        | 435  | Ornithine N-monooxygenase                        | WP_282090893 (98.39)       | WP_031050897 (97.24)                | WP_237510742 (87.13)           |
| DpnS4        | 1266 | NRPS                                             | WP_282090892 (ND)          | WP_234332471 (92.05)                | WP_237510743 (88.39)           |
| DpnS3        | 2569 | NRPS                                             | WP_282085203 (ND)          | NI                                  | WP_237510744 (83.91)           |
| DpnS2        | 2888 | NRPS                                             | WP_282085205 (97.33)       | WP_031042662 (94.91)                | WP_272933399 (87.08)           |
| DpnO3        | 395  | NAD(P)/FAD-dependent oxidoreductase              | WP_282085206 (99.49)       | WP_031042659 (96.46)                | WP_237510745 (92.41)           |
| DpnR2        | 227  | LmbU family transcriptional regulator            | WP_282085207 (96.04)       | WP_031042656 (94.59)                | WP_272933409 (83.48)           |
| DpnM         | 72   | MbtH family protein                              | WP_282085209 (98.57)       | WP_031042654 (98.61)                | WP_237510747 (87.50)           |
| DpnC         | 460  | Crotonyl-CoA carboxylase/reductase               | WP_282085210 (98.91)       | WP_051851967 (97.17)                | WP_237510748 (92.39)           |
| DpnT3        | 273  | ABC transporter ATP-binding protein              | WP_282085212 (98.90)       | WP_051851966 (96.34)                | WP_237510749 (87.50)           |
| DpnT4        | 253  | ABC transporter permease                         | WP_282085214 (99.21)       | WP_031042645 (98.81)                | WP_272933410 (93.36)           |
| DpnK1        | 274  | SDR family oxidoreductase                        | WP_282085940 (99.64)       | WP_031042642 (97.81)                | MCG0284487 (90.51)             |
| DpnQ         | 902  | NRPS                                             | WP_282085216 (96.78)       | WP_037836225 (91.01)                | WP_237510751 (81.58)           |
| DpnR3        | 205  | LmbU family transcriptional regulator            | WP_282085218 (98.86)       | WP_051851965 (96.59)                | WP_272933400 (87.50)           |

Numbers between brackets indicate percentage of identical amino acids to the corresponded Dpn protein. ND, not determined. NI, not identified. aa, number of amino acids of Dpn proteins.

**Table S2.** Oligonucleotides used for PCR amplification

| PRIMER                 | SEQUENCE 5'-3'                                    |
|------------------------|---------------------------------------------------|
| C9C2                   | <u>GATATCATGCCGTCTCGCACTCCC</u>                   |
| C9C1                   | <u>GAATTCCTAGGCGAAGAGGTCCAAGG</u>                 |
| 113C1orf18-indC-F      | AAAAT <b>CTAGAG</b> AGCCGATACCAGATGGAG            |
| 113C1orf18-indC-R      | AAA <b>AGATAT</b> CGCTGTCTCCAAATCGGCA             |
| 113C1orf18-indC-comp-R | CGTTGTAGGTCCGTGACG                                |
| M13-F                  | GTAAACGACGGCCAG                                   |
| 113C1orf18A-F          | <u>CTTGACATTGGGGAATTGACGTCGACATGAAGGTCACG</u>     |
| 113C1orf18A-R          | <u>CGGGGACCTGCAGGTCGACTCAGGAAGTTCGCCAGTGC</u>     |
| 113C1orf18B-F          | <u>CCGCCGAAAGTTCCTCGAAGGCGAGCTGACCAATTCGTC</u>    |
| 113C1orf18B-R          | <u>GGCATCAGTTACCGTGAGCGTACGGAGTACCTCGTGC</u>      |
| 113C1orf18-comp-F      | TGATCGACCGGTACTTCTCG                              |
| 113C1orf18-comp-R      | CAACGGGATCATCGACGCTC                              |
| NRPSint113_I_RV        | CGAGGACGTCGATGG                                   |
| NRPSint113_D_FW        | GCACGACAGGTGTTC                                   |
| 113C1orf2A-F           | <u>CTTGACATTGGGGAATTGACGGCAACAGTCCTTCGCCGACAG</u> |
| 113C1orf2A-R           | <u>CGGGGACCTGCAGGTCGACTCACGGGCACACAGTTCGTAG</u>   |
| 113C1orf2B-F           | <u>CCGCCGAAAGTTCCTCGAAGGAGAACGACGACTTGATGGC</u>   |
| 113C1orf2B-R           | <u>GGCATCAGTTACCGTGAGCGGACTGCGAGTGATCAGTTC</u>    |
| 113C1orf2-comp-F       | GGATCCGCACTGACGCTGGACAACAG                        |
| 113C1orf2-comp-R       | GGATCCTGGGCAGATCACGAGAGTGC                        |
| 113C1orf15A-F          | <u>CTTGACATTGGGGAATTGACGAGTGGGGAGATCGTGGAATC</u>  |
| 113C1orf15A-R          | <u>CGGGGACCTGCAGGTCGACTTGACGCATGAACAGGTCTC</u>    |
| 113C1orf15B-F          | <u>CCGCCGAAAGTTCCTCGAAGCGGCTTTCTGGCAGATGTTG</u>   |
| 113C1orf15B-R          | <u>GGCATCAGTTACCGTGAGCGGGACCGAAACCGATACCG</u>     |
| 113C1orf15-comp-F      | GGATCCACGCCACACATGACGAAATG                        |
| 113C1orf15-comp-R      | GGATCCTCAACTCCGATCACTGGTCC                        |
| 113C1orf2-OE-Tc-F      | <u>ACAATCGTGCCGGTTGGTAGGCACTGACGCTGGACAACAG</u>   |
| 113C1orf2-OE-Tc-R      | <u>ACAGCTATGACATGATTACGTGGGCAGATCACGAGAGTGC</u>   |
| ApraGib-F              | GCTCACGGTAACTGATGCC                               |
| ApraGib-R              | CGTCAATTCCCAATGTCAAG                              |

\* Restriction sites are in bold; nucleotide sequences for Gibson assembly of DNA are underlined.

**Table S3.** NMR data of diperamycin in DMSO-d<sub>6</sub> (500 MHz, 24 °C)

| Position                                 | $\delta_c$ , type     | $\delta_H$ , mult. (J in Hz)                 | Position          | $\delta_c$ , type     | $\delta_H$ , mult. (J in Hz)       |
|------------------------------------------|-----------------------|----------------------------------------------|-------------------|-----------------------|------------------------------------|
| <b>L-Thr</b>                             |                       |                                              | <b>L-Pip</b>      |                       |                                    |
| CO                                       | 167.7, C              |                                              | CO                | 172.0, C              |                                    |
| C $_{\alpha}$                            | 48.2, CH              | 5.56, br s                                   | C $_{\alpha}$     | 48.2, CH              | 5.57, br s                         |
| C $_{\beta}$                             | 71.4, CH              | 4.76, br s                                   | C $_{\beta}$      | 24.4, CH <sub>2</sub> | 1.84, m (ov.)<br>2.14, m (ov.)     |
| C $_{\gamma}$                            | 15.9, CH <sub>3</sub> | 1.24, d (6.2)                                | C $_{\gamma}$     | 20.9, CH <sub>2</sub> | 1.51, m (ov.)                      |
| NH                                       |                       | 8.12, d (9.0)                                | C $_{\delta}$     | 46.5, CH <sub>2</sub> | 2.66, m (ov.)<br>3.02, br d (11.5) |
|                                          |                       |                                              | NH                |                       | 4.94, br d (12.5)                  |
| <b>D-Pip</b>                             |                       |                                              | <b>N-OH-D-Ala</b> |                       |                                    |
| CO                                       | 174.5, C              |                                              | CO                | 169.3, C              |                                    |
| C $_{\alpha}$                            | 48.4, CH              | 5.33, dd (6.7, 2.8)                          | C $_{\alpha}$     | 53.4, CH              | 5.07, br m                         |
| C $_{\beta}$                             | 24.3, CH <sub>2</sub> | 1.84, m (ov.)<br>2.07, m (ov.)               | C $_{\beta}$      | 13.5, CH <sub>3</sub> | 1.24, d (6.4)                      |
| C $_{\gamma}$                            | 20.6, CH <sub>2</sub> | 1.51, m (ov.)                                | NOH               |                       | 10.29, s                           |
| C $_{\delta}$                            | 46.3, CH <sub>2</sub> | 2.67, m (ov.)<br>3.02, br d (11.5)           |                   |                       |                                    |
| NH                                       |                       | 5.00, br d (11.9)                            |                   |                       |                                    |
| <b>N-OH-<math>\beta</math>-MeO-L-Ala</b> |                       |                                              | <b>Polyketide</b> |                       |                                    |
| CO                                       | 167.2, C              |                                              | 1                 | 177.2, C              |                                    |
| C $_{\alpha}$                            | 57.3, CH              | 5.14, dd (8.1, 5.5)                          | 2                 | 75.6, C               |                                    |
| C $_{\beta}$                             | 67.1, CH <sub>2</sub> | 3.70, dd (10.8, 5.5)<br>3.75, dd (10.8, 8.1) | 3                 | 98.8, C               |                                    |
| CH <sub>3</sub> O                        | 57.9, CH <sub>3</sub> | 3.26, s                                      | 4                 | 27.0, CH <sub>2</sub> | 1.53, m (ov.)<br>1.61, m (ov.)     |
| NOH                                      |                       | 10.29, s                                     | 5                 | 23.7, CH <sub>2</sub> | 1.32, m (ov.)<br>1.62, m (ov.)     |
| <b>Gly</b>                               |                       |                                              | 6                 | 41.1, CH              | 0.99, m (ov.)                      |
| CO                                       | 168.6, C              |                                              | 7                 | 70.0, CH              | 3.54, dq (8.0, 6.3)                |
| C $_{\alpha}$                            | 41.5, CH <sub>2</sub> | 3.81, dd (17.8, 4.3)<br>4.20, dd (17.8, 3.5) | 8                 | 20.2, CH <sub>3</sub> | 1.24, s                            |
| NH                                       |                       | 6.97, m (ov.)                                | 9                 | 31.2, CH <sub>2</sub> | 0.95, m (ov.)<br>1.32, m (ov.)     |
|                                          |                       |                                              | 10                | 25.7, CH <sub>2</sub> | 1.15, m (ov.)<br>1.32, m (ov.)     |
|                                          |                       |                                              | 11                | 29.1, CH <sub>2</sub> | 1.23, m (ov.)                      |
|                                          |                       |                                              | 12                | 31.2, CH <sub>2</sub> | 1.24, m (ov.)                      |
|                                          |                       |                                              | 13                | 22.1, CH <sub>2</sub> | 1.26, m (ov.)                      |
|                                          |                       |                                              | 14                | 14.0, CH <sub>3</sub> | 0.86, t (6.3)                      |

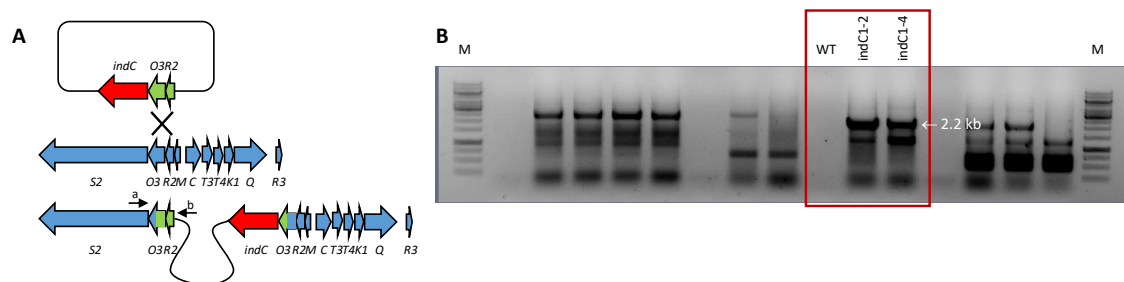

**Figure S1.** Generation of CS113R-indC1 strain. (A) Graphical representation of the generation of the recombinant strain; (B) PCR analysis of CS113R-indC1 mutant strain (lanes framed in red). PCR products from the wild type (WT) strain and from the CS113R-indC1 mutant strain (indC1) using oligonucleotides 113C1orf18-indC-comp-R (a) and M13-F (b). indC1-2 and indC1-4 correspond to two independent mutant strains. M, 1 kb ladder. *indC*, indigoidine reporter gene.

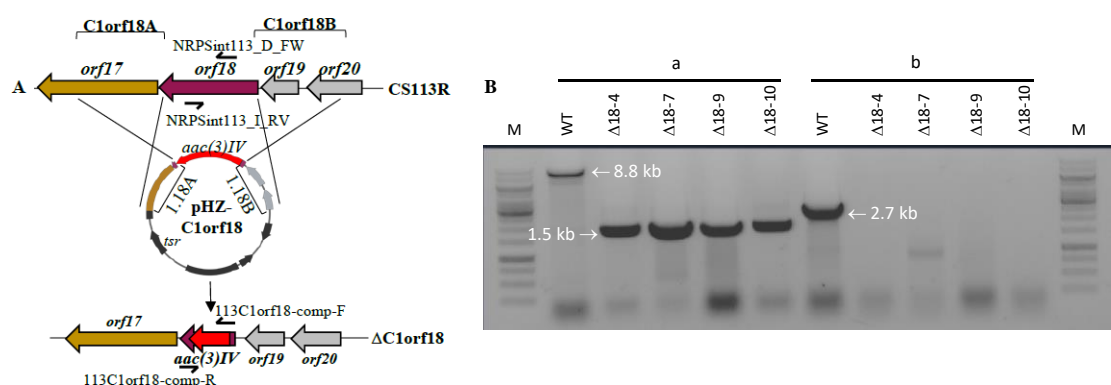

**Figure S2.** Generation of CS113R- $\Delta$ C1orf18 mutant. (A) Graphical representation of the generation of the mutant strain. *Orf17*, *orf18*, *orf19* and *orf20* correspond to *dpnS3*, *dpnS2*, *dpnO3* and *dpnR2*, respectively; (B) PCR analysis of CS113R- $\Delta$ C1orf18 mutant strain. PCR products from the wild type (WT) strain and from CS113R- $\Delta$ C1orf18 mutant strain ( $\Delta$ 18) using oligonucleotides 113C1orf18-comp-F and 113C1orf18-comp-R (a); and NRPSint113\_I\_RV and NRPSint113\_D\_FW (b).  $\Delta$ 18-4,  $\Delta$ 18-7,  $\Delta$ 18-9 and  $\Delta$ 18-10 correspond to four independent mutants. M, 1 kb ladder. *aac(3)/IV*, apramycin resistance gene.

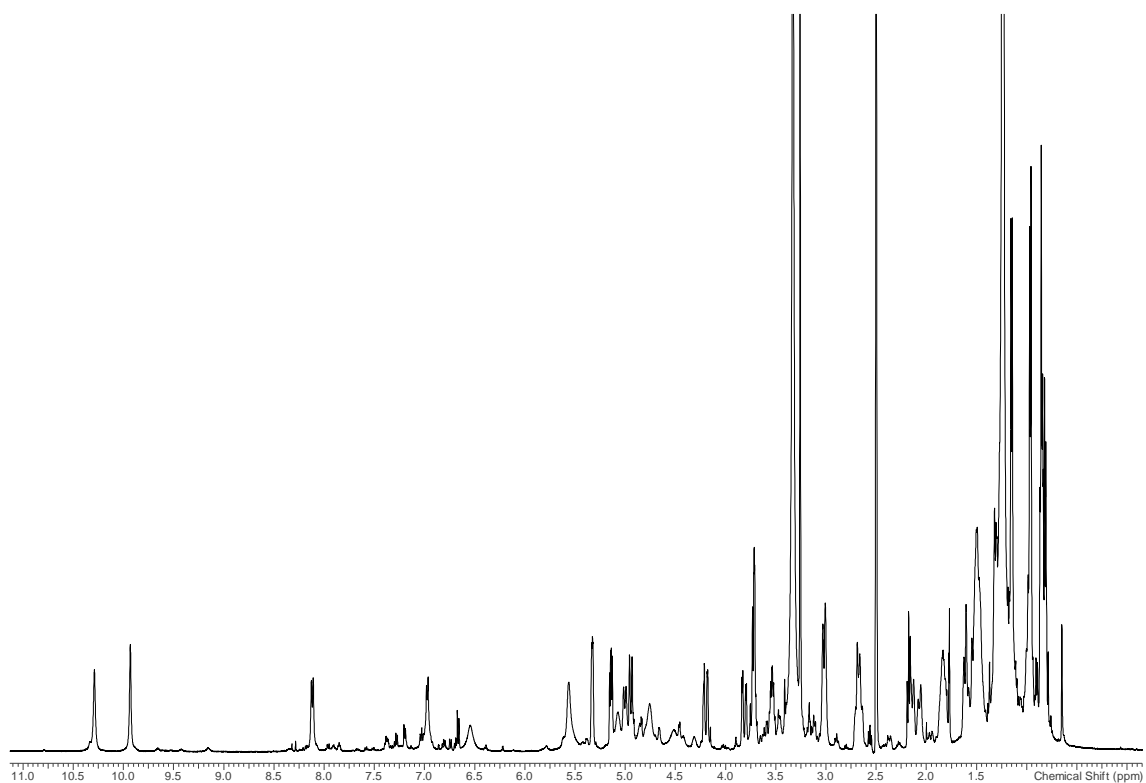

**Figure S3.**  $^1\text{H}$  NMR spectrum of diperamycin ( $\text{DMSO-}d_6$ , 500 MHz, 24 °C).

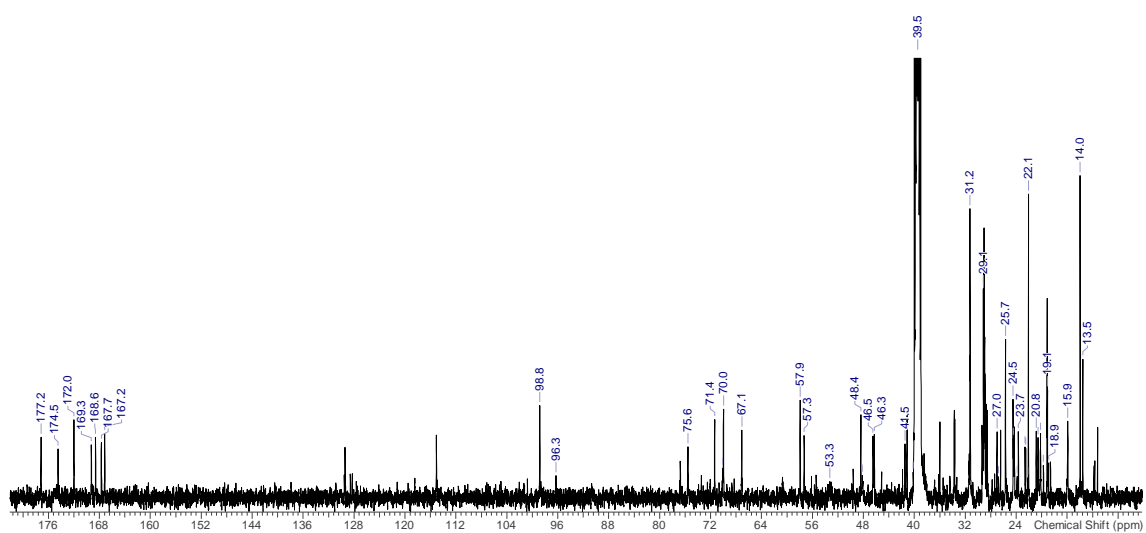

**Figure S4.**  $^{13}\text{C}$  NMR spectrum of diperamycin ( $\text{DMSO-}d_6$ , 125 MHz, 24 °C).

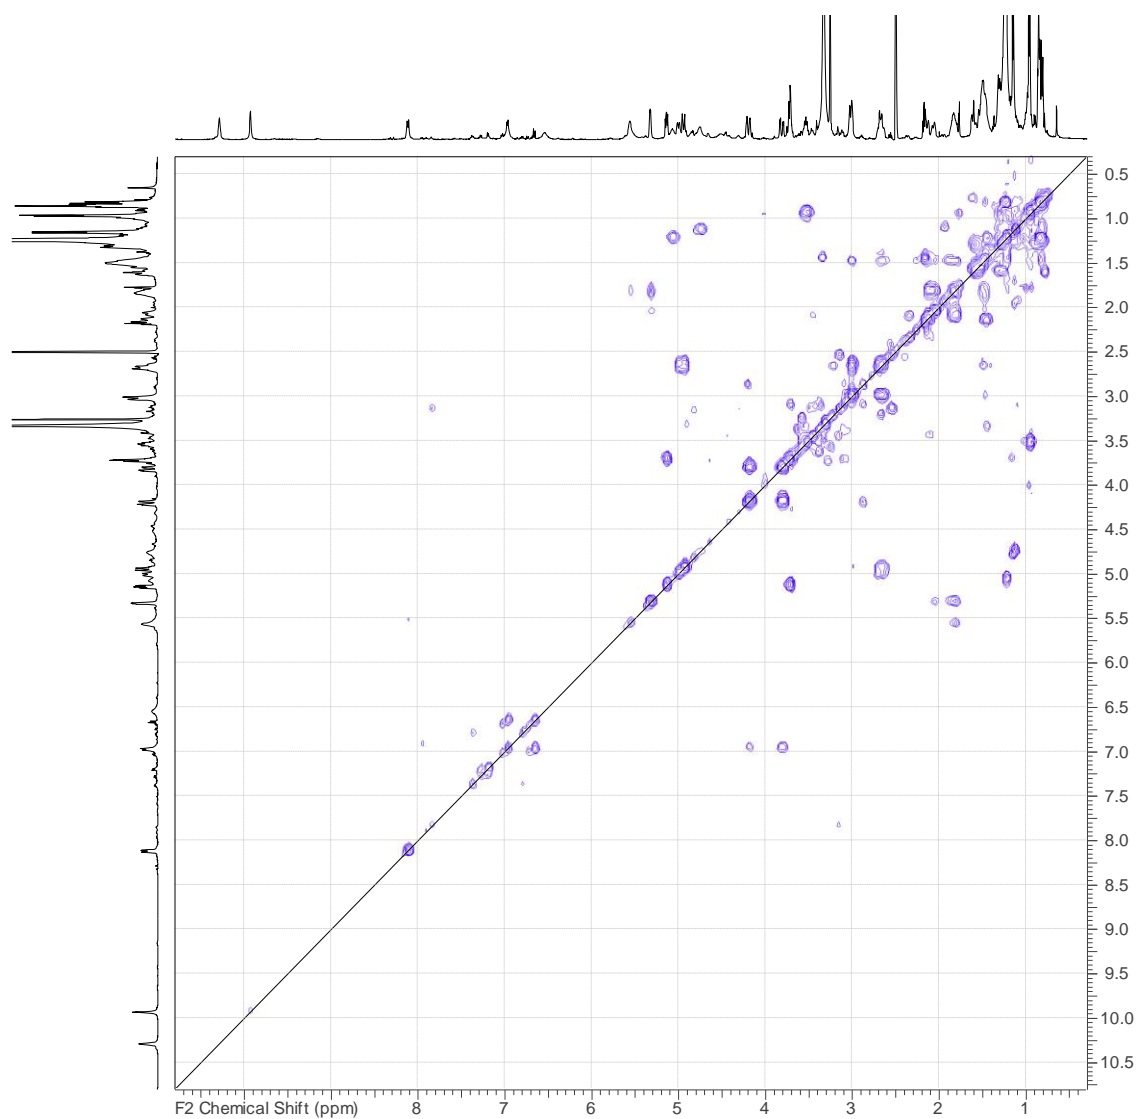

**Figure S5.** COSY spectrum of dipramycin.

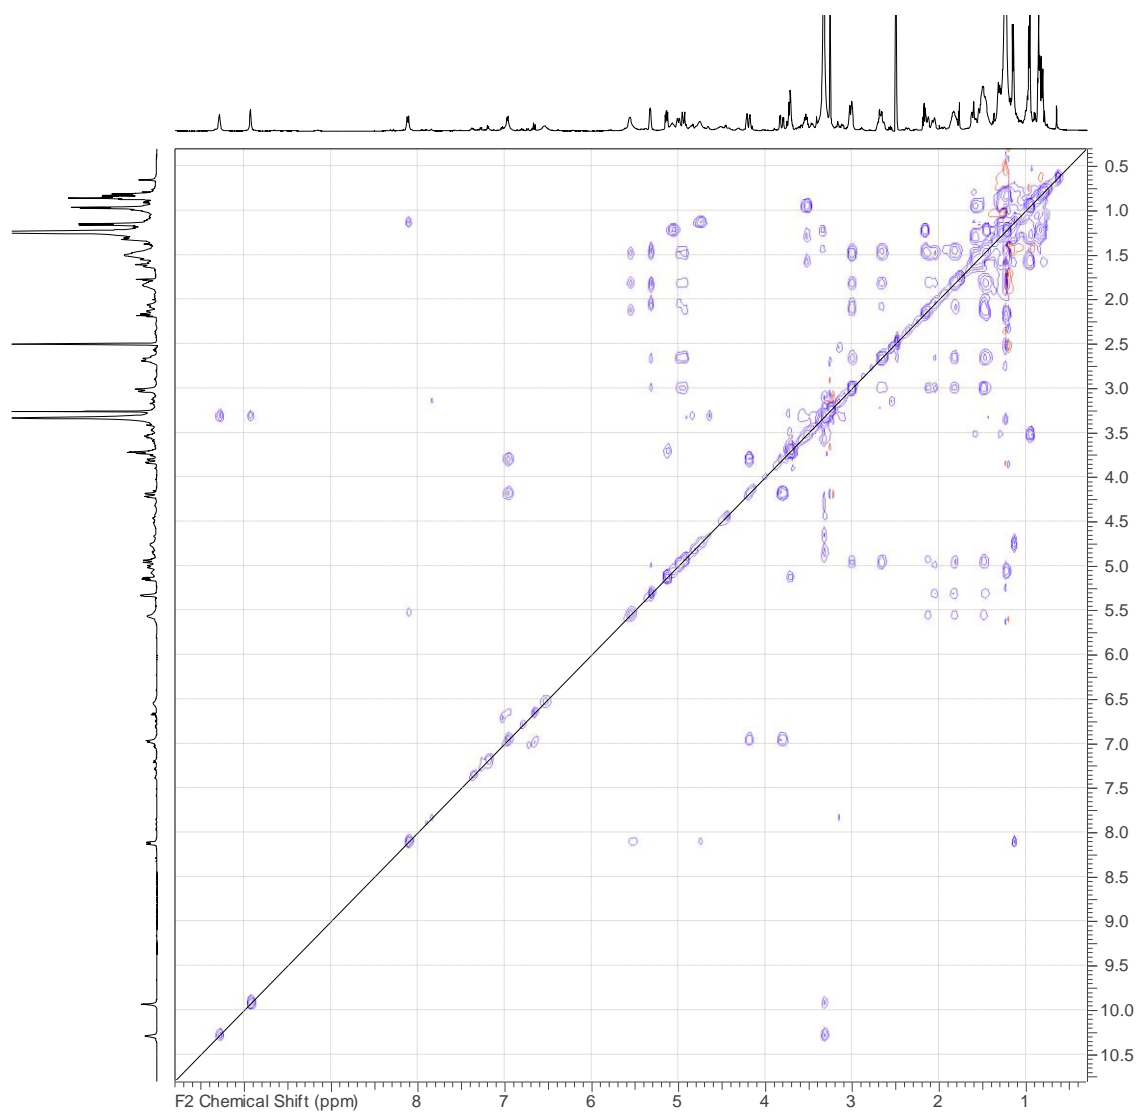

**Figure S6.** TOCSY spectrum of diperamycin.



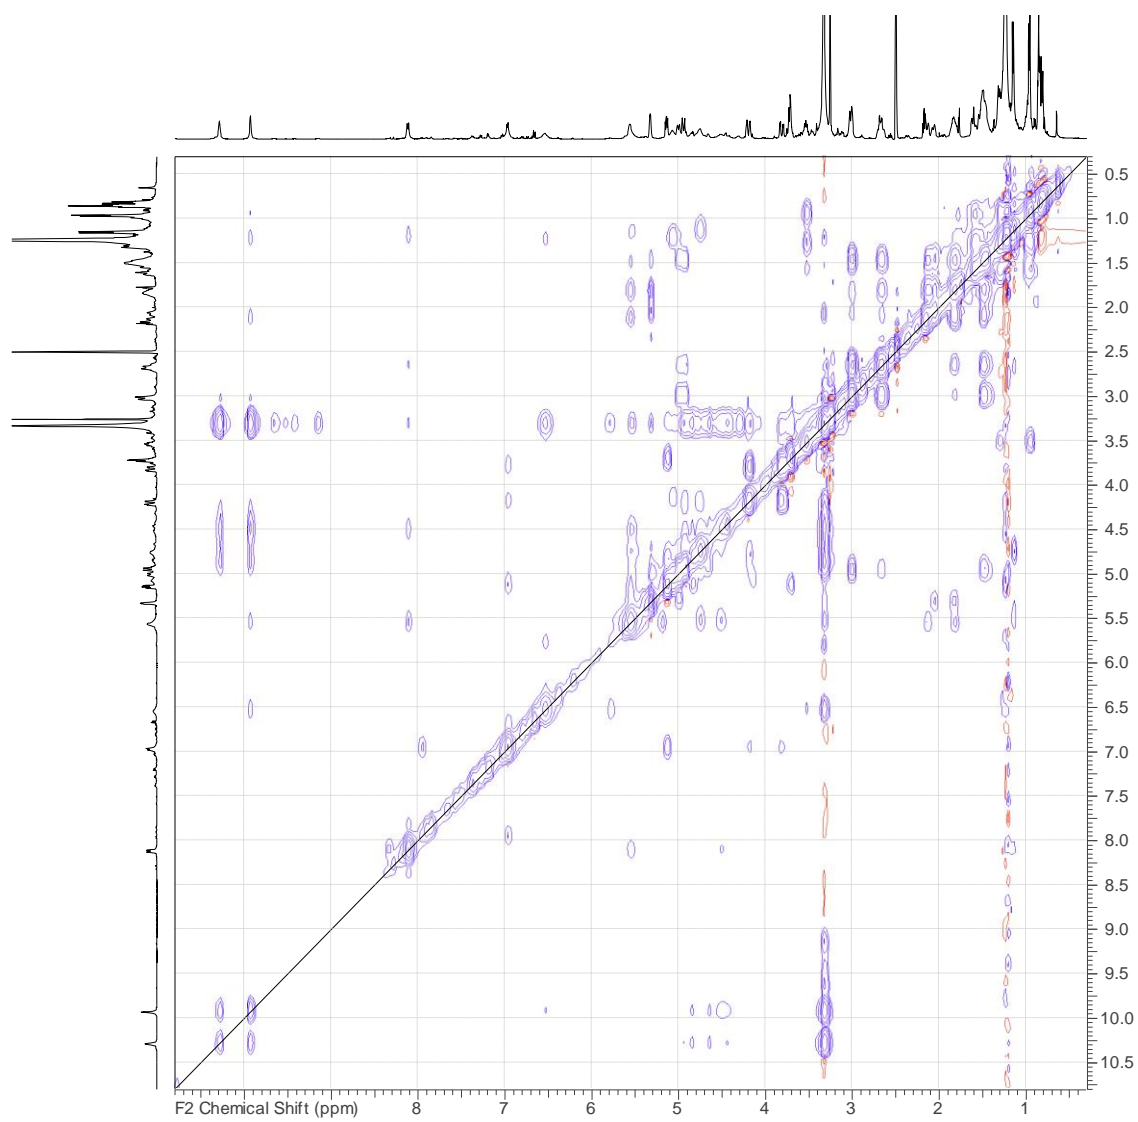

**Figure S7.** NOESY spectrum of diperamycin.

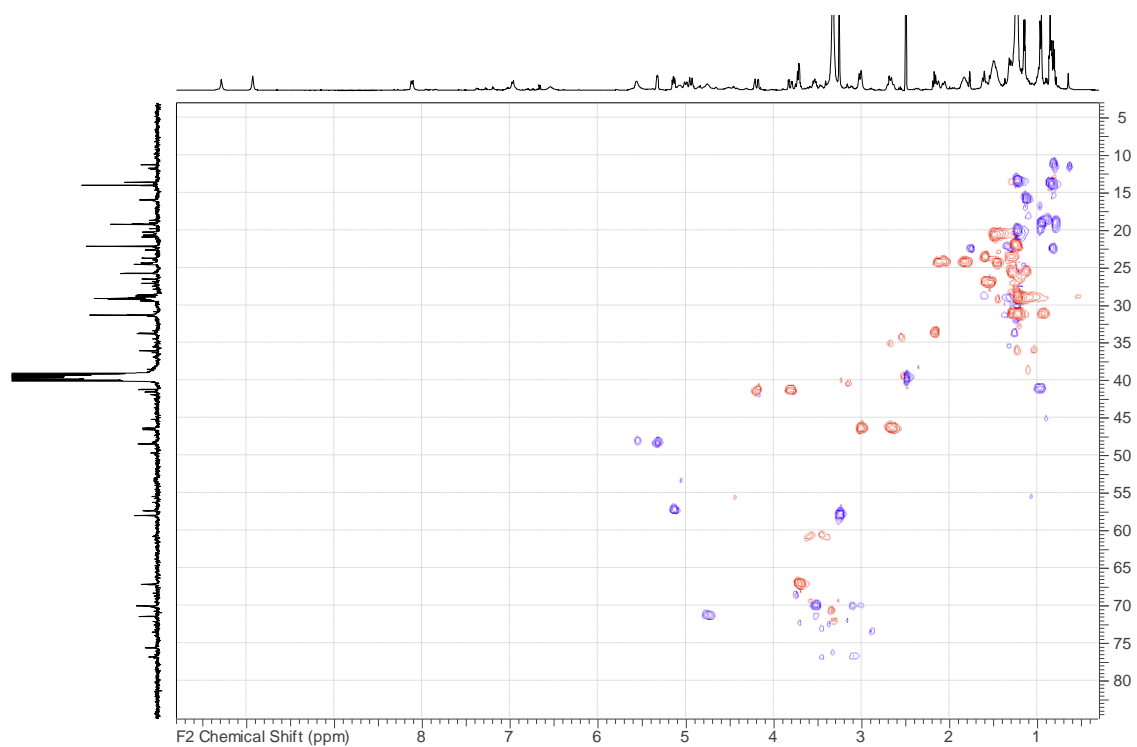

**Figure S8.** Multiplicity-edited HSQC spectrum of diperamycin.

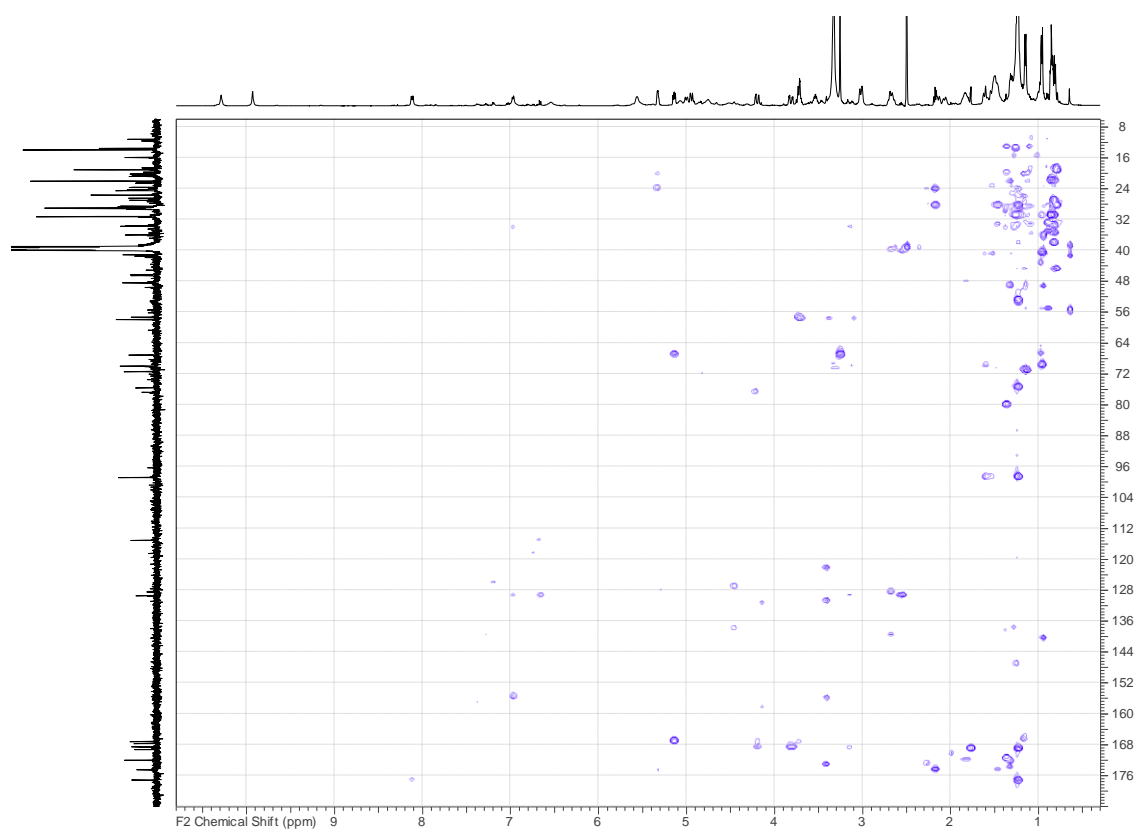

**Figure S9.** HMBC spectrum of diperamycin

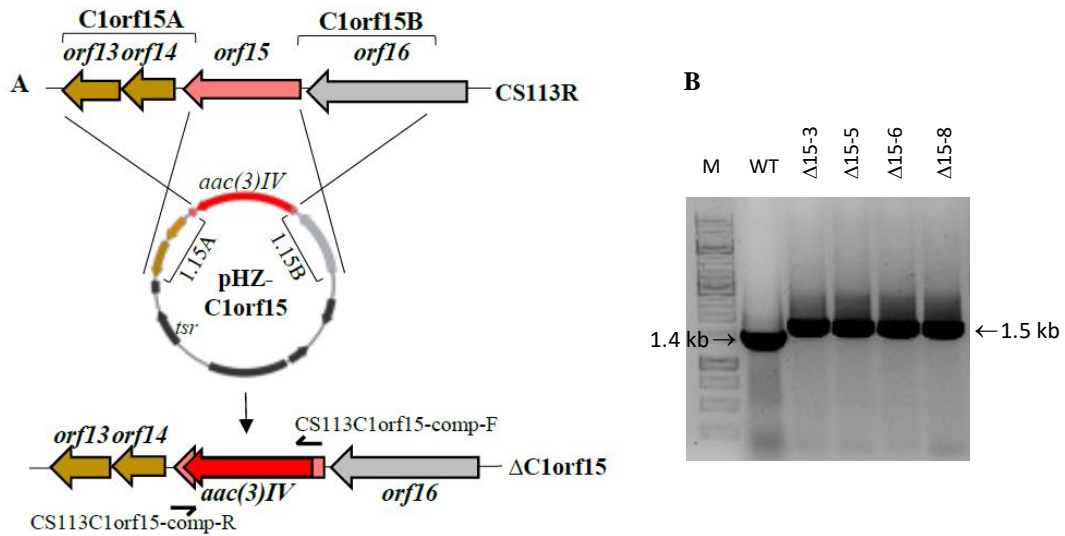

**Figure S10.** Generation of CS113R- $\Delta$ C1orf15 mutant. (A) Graphical representation of the generation of the mutant strain. *Orf13*, *orf14*, *orf15* and *orf16* correspond to *dpnT2*, *dpnB2*, *dpnO2* and *dpnS4*, respectively; (B) PCR analysis of CS113R- $\Delta$ C1orf15 mutant strain. PCR products from the wild type (WT) strain and from the CS113R- $\Delta$ C1orf15 mutant strain ( $\Delta$ 15) using oligonucleotides 113C1orf15-comp-F and 113C1orf15-comp-R.  $\Delta$ 15-3,  $\Delta$ 15-5,  $\Delta$ 15-6 and  $\Delta$ 15-8 correspond to four independent mutants. M, 1 kb ladder. *aac(3)IV*, apramycin resistance gene.

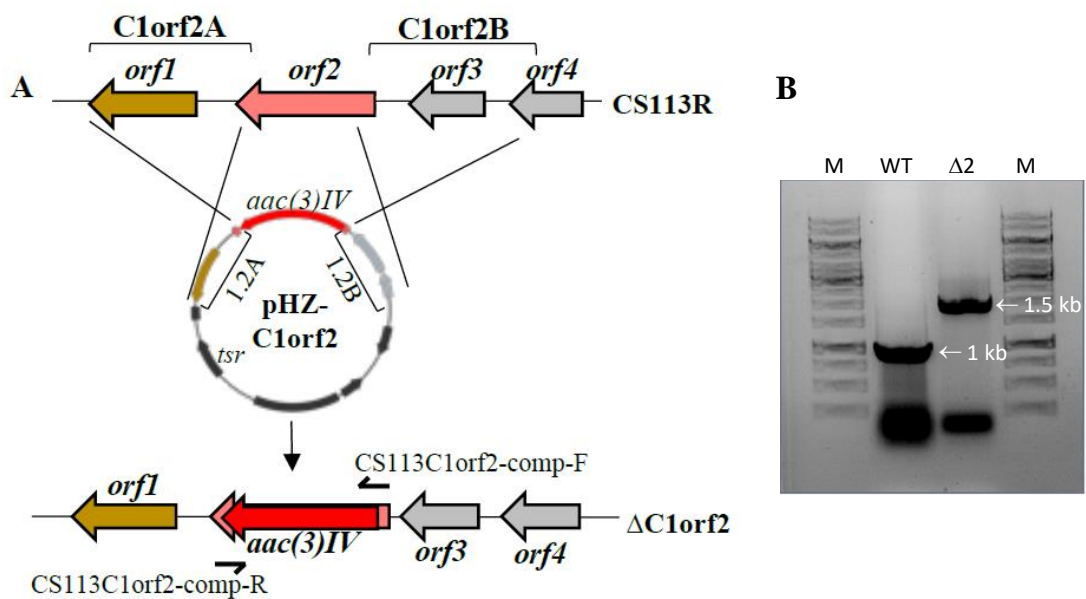

**Figure S11.** Generation of CS113R- $\Delta$ C1orf2 mutant. (A) Graphical representation of the generation of the mutant strain. *Orf1*, *orf2*, *orf3* and *orf4* correspond to *dpnL*, *dpnZ*, *dpnA* and *dpnB1*, respectively; (B) PCR analysis of CS113R- $\Delta$ C1orf2 mutant strain. PCR products from the wild type (WT) strain and from the CS113R- $\Delta$ C1orf2 mutant strain ( $\Delta$ 2) using oligonucleotides 113C1orf2-comp-F and 113C1orf2-comp-R. M, 1 kb ladder. *aac(3)/IV*, apramycin resistance gene.

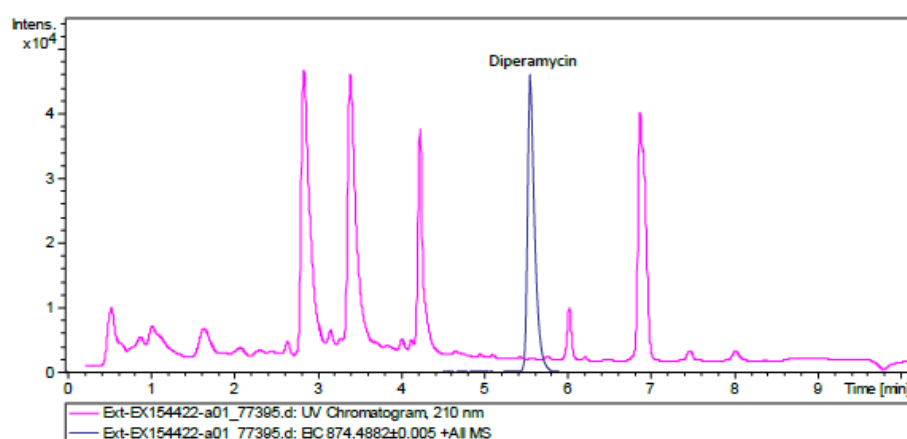

P1

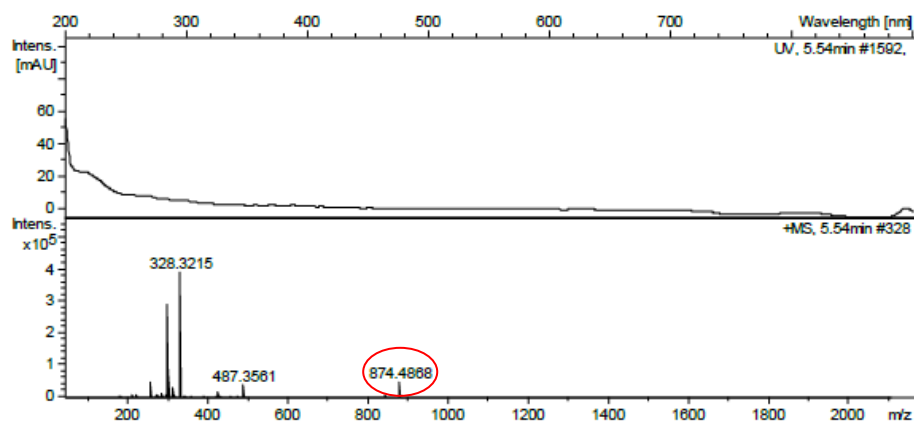

**Figure S12.** Complementation of CS113R- $\Delta$ C1orf2 mutant with pSETETc-C1orf2. Chromatogram at 210 nm and extracted ion ( $[M+NH_4]^+$ ) chromatogram and HRMS spectrum of diperamycin.
